# Supplementary material for: Diagnostic performance of regional systematic biopsy for prostate cancer stratified by PI-RADS and histologic zones
Source: Springer Nature journal article supplement (doi:10.1186/s13244-024-01680-1), 2024-05-16
Supplement: MOESM1 [file 27099622]

## Diagnostic Performance of Regional Systematic Biopsy for Prostate Cancer

### Stratified by PI-RADS and Histologic Zones

#### ELECTRONIC SUPPLEMENTARY MATERIAL

Supplementary Table S1. Diagnostic performances of different prostate sampling schemes in TZ

| PI-RADS |        | n   | PCa        | $p^*$   | Kappa* | csPCa      | $p^*$   | Kappa* |
|---------|--------|-----|------------|---------|--------|------------|---------|--------|
| 3       | TB+SB  | 167 | 61 (36.5)  | -       | -      | 38 (22.8)  | -       | -      |
|         | TB     | 167 | 46 (27.5)  | < 0.001 | 0.796  | 33 (19.8)  | 0.063   | 0.911  |
|         | SB     | 167 | 52 (31.1)  | 0.004   | 0.880  | 34 (20.4)  | 0.125   | 0.929  |
|         | TB+RSB | 167 | 58 (34.7)  | 0.25    | 0.961  | 38 (22.8)  | 1       | 1      |
| 4       | TB+SB  | 141 | 112 (79.4) | -       | -      | 95 (67.4)  | -       | -      |
|         | TB     | 141 | 99 (70.2)  | < 0.001 | 0.758  | 87 (61.7)  | 0.008   | 0.876  |
|         | SB     | 141 | 95 (67.4)  | < 0.001 | 0.697  | 80 (56.7)  | < 0.001 | 0.777  |
|         | TB+RSB | 141 | 110 (78.0) | 1       | 0.979  | 95 (67.4)  | 1       | 1      |
| 5       | TB+SB  | 419 | 404 (96.4) | -       | -      | 393 (93.8) | -       | -      |
|         | TB     | 419 | 397 (94.7) | 0.016   | 0.802  | 388 (92.6) | 0.063   | 0.906  |
|         | SB     | 419 | 393 (93.8) | 0.001   | 0.719  | 384 (91.6) | 0.004   | 0.841  |
|         | TB+RSB | 419 | 404 (96.4) | 1       | 1      | 393 (93.8) | 1       | 1      |

\*Compared with TB+SB

TB = targeted biopsy; SB = systematic biopsy; RSB = regional systematic biopsy;

mpMRI = multiparametric magnetic resonance imaging; PI-RADS = Prostate Imaging

Reporting and Data System; PCa = prostate cancer; csPCa = clinically significant prostate cancer; TZ = transitional zone

Supplementary Table S2. Diagnostic performances of different prostate sampling schemes compared with TB+RSB in PZ

| PI-RADS |        | n   | PCa        | <i>p</i> * | Kappa* | csPCa      | <i>p</i> * | Kappa* |
|---------|--------|-----|------------|------------|--------|------------|------------|--------|
|         | TB+RSB | 158 | 63 (39.9)  | -          | -      | 51 (32.3)  | -          | -      |
| 3       | TB     | 158 | 51 (32.3)  | < 0.001    | 0.836  | 43 (27.2)  | 0.008      | 0.879  |
|         | SB     | 158 | 61 (38.6)  | 0.625      | 0.947  | 49 (31.0)  | 0.625      | 0.941  |
|         | TB+RSB | 325 | 269 (82.8) | -          | -      | 243 (74.8) | -          | -      |
| 4       | TB     | 325 | 234 (72.0) | < 0.001    | 0.697  | 218 (67.0) | < 0.001    | 0.815  |
|         | SB     | 325 | 255 (78.5) | < 0.001    | 0.823  | 228 (70.1) | < 0.001    | 0.885  |
|         | TB+RSB | 505 | 486 (96.2) | -          | -      | 483 (95.6) | -          | -      |
| 5       | TB     | 505 | 482 (95.4) | 0.125      | 0.901  | 479 (94.9) | 0.125      | 0.913  |
|         | SB     | 505 | 484 (95.8) | 0.5        | 0.948  | 481 (95.2) | 0.5        | 0.954  |

\*Compared with TB+RSB

TB = targeted biopsy; SB = systematic biopsy; RSB = regional systematic biopsy; PI-RADS = Prostate Imaging Reporting and Data System; PCa = prostate cancer; csPCa = clinically significant prostate cancer; PZ = peripheral zone

Supplementary Table S3. Diagnostic performances of different prostate sampling schemes compared with TB+RSB in TZ

| PI-RADS |        | n   | PCa        | $p^*$   | Kappa* | csPCa      | $p^*$   | Kappa* |
|---------|--------|-----|------------|---------|--------|------------|---------|--------|
|         | TB+RSB | 167 | 58 (34.7)  | -       | -      | 38 (22.8)  | -       | -      |
| 3       | TB     | 167 | 46 (27.5)  | < 0.001 | 0.833  | 33 (19.8)  | 0.063   | 0.911  |
|         | SB     | 167 | 52 (31.1)  | 0.146   | 0.838  | 34 (20.4)  | 0.125   | 0.929  |
|         | TB+RSB | 141 | 110 (78.0) | -       | -      | 95 (67.4)  | -       | -      |
| 4       | TB     | 141 | 99 (70.2)  | < 0.001 | 0.778  | 87 (61.7)  | 0.008   | 0.876  |
|         | SB     | 141 | 95 (67.4)  | < 0.001 | 0.681  | 80 (56.7)  | < 0.001 | 0.777  |
|         | TB+RSB | 419 | 404 (96.4) | -       | -      | 393 (93.8) | -       | -      |
| 5       | TB     | 419 | 397 (94.7) | 0.016   | 0.802  | 388 (92.6) | 0.063   | 0.906  |
|         | SB     | 419 | 393 (93.8) | < 0.001 | 0.719  | 384 (91.6) | 0.004   | 0.841  |

\*Compared with TB+RSB

TB = targeted biopsy; SB = systematic biopsy; RSB = regional systematic biopsy; PI-RADS = Prostate Imaging Reporting and Data System; PCa = prostate cancer; csPCa = clinically significant prostate cancer; TZ = transitional zone
